# Supplementary material
Source: PubMed Central journal article supplement (PMC6035295)
Supplement: mmc1.pdf [file mmc1.pdf]

**Biophysical Journal, Volume 115**

**Supplemental Information**

**Retinal Configuration of *ppR* Intermediates Revealed by Photoirradiation Solid-State NMR and DFT**

**Yoshiteru Makino, Izuru Kawamura, Takashi Okitsu, Akimori Wada, Naoki Kamo, Yuki Sudo, Kazuyoshi Ueda, and Akira Naito**

**Table S1.**  $^{13}\text{C}$  NMR chemical shift values of [14, 20- $^{13}\text{C}$ ] Ret in retinal binding microbial proteins [ppm]

|                           |                 | 20- $^{13}\text{C}$ | 14- $^{13}\text{C}$ | Configuration                      | Ref. |
|---------------------------|-----------------|---------------------|---------------------|------------------------------------|------|
| <i>ppR</i> (0°C)          | G-state         | 13.3                |                     | 13- <i>trans</i> , 15- <i>anti</i> | (1)  |
|                           | M-intermediate  | 22.3                |                     | 13- <i>cis</i> , 15- <i>anti</i>   | (1)  |
| <i>ppR</i> (-20°C)        | G-state         | 13.5                |                     | 13- <i>trans</i> , 15- <i>anti</i> | (1)  |
|                           | M-intermediate  | 24.1, 22.5, 21.7    |                     | 13- <i>cis</i> , 15- <i>anti</i>   | (1)  |
| <i>ppR</i> (-40°C)        | G-state         | 13.5                | 121.7               | 13- <i>trans</i> , 15- <i>anti</i> |      |
|                           | M-intermediate  | 22.3                | 126.8               | 13- <i>cis</i> , 15- <i>anti</i>   |      |
| <i>ppR</i> (-60°C)        | G-state         | 13.6                | 121.6               | 13- <i>trans</i> , 15- <i>anti</i> |      |
|                           | O-intermediate  | 16.4                | 115.4               | 13- <i>trans</i> , 15- <i>syn</i>  |      |
|                           | M-intermediate  | 22.6                | 127.1               | 13- <i>cis</i> , 15- <i>anti</i>   |      |
|                           | N'-intermediate | 23.9                | 115.4               | 13- <i>cis</i>                     |      |
| <i>ppR/pHtrII</i> (0°C)   | G-state         | 13.6                |                     | 13- <i>trans</i> , 15- <i>anti</i> | (1)  |
|                           | M-intermediate  | 22.7                |                     | 13- <i>cis</i> , 15- <i>anti</i>   | (1)  |
| <i>ppR/pHtrII</i> (-20°C) | G-state         | 13.5                |                     | 13- <i>cis</i> , 15- <i>anti</i>   | (1)  |
|                           | M-intermediate  | 23.5, 22.3, 21.3    |                     | 13- <i>cis</i> , 15- <i>anti</i>   | (1)  |
| <i>ppR/pHtrII</i> (-40°C) | G-state         | 13.5                |                     | 13- <i>trans</i> , 15- <i>anti</i> |      |
|                           | O-intermediate  | 16.1                |                     | 13- <i>trans</i>                   |      |
|                           | M-intermediate  | 22.1, 22.9          |                     | 13- <i>cis</i> , 15- <i>anti</i>   |      |
|                           | N'-intermediate | 23.9                |                     | 13- <i>cis</i>                     |      |
| SrSRI (-40°C)             | G-state         | 13.8                |                     | 13- <i>trans</i> , 15- <i>anti</i> | (2)  |
|                           | M-intermediate  | 19.8                |                     | 13- <i>cis</i>                     | (2)  |
|                           | P-intermediate  | 24.8                |                     | 13- <i>cis</i> , 15- <i>anti</i>   | (2)  |
| bR                        | bR(568)(AT)     | 13.3                | 122.0               | 13- <i>trans</i> , 15- <i>anti</i> | (3)  |
|                           | bR(568)(CS)     | 22.0                | 110.5               | 13- <i>cis</i> , 15- <i>syn</i>    | (3)  |
|                           | M <sub>0</sub>  | 21.5                | 124.5               | 13- <i>cis</i> , 15- <i>anti</i>   | (4)  |
|                           |                 | 19.5                |                     | 13- <i>cis</i> , 15- <i>anti</i>   | (5)  |
|                           | M <sub>n</sub>  | 17.8 <sup>a</sup>   | 124.6 <sup>b</sup>  | 13- <i>cis</i> , 15- <i>anti</i>   | (5)  |
|                           |                 |                     |                     |                                    | (6)  |
|                           | N               |                     | 115.2               | 13- <i>cis</i> , 15- <i>anti</i>   | (7)  |
| bR (Y185F)                | AT              | 13.2                | 123.1               | 13- <i>trans</i> , 15- <i>anti</i> | (8)  |
|                           | CS              | 21.7                | 110.0               | 13- <i>cis</i> , 15- <i>syn</i>    | (8)  |
|                           | CS*             | 18.0                | 115.3               | 13- <i>cis</i> , 15- <i>syn</i>    | (8)  |
|                           | N               | 19.2                | 125.4               | 13- <i>cis</i> , 15- <i>anti</i>   | (8)  |
|                           | O               | 13.2                | 123.1               | 13- <i>trans</i> , 15- <i>anti</i> | (8)  |

<sup>a</sup>Ref. (5).

<sup>b</sup>Ref. (6).

**Table S2.** The basis set dependence of the calculation of chemical shift examined for G-state of retinal using several basis sets.

| Base set  | <sup>13</sup> C NMR chemical shift values [ppm] |                             |
|-----------|-------------------------------------------------|-----------------------------|
|           | 14- <sup>13</sup> C retinal                     | 20- <sup>13</sup> C retinal |
| 6-311G    | 129.4                                           | 18.9                        |
| 6-311G*   | 126.8                                           | 17.6                        |
| 6-311G**  | 128.0                                           | 18.2                        |
| 6-311+G** | 127.9                                           | 17.4                        |

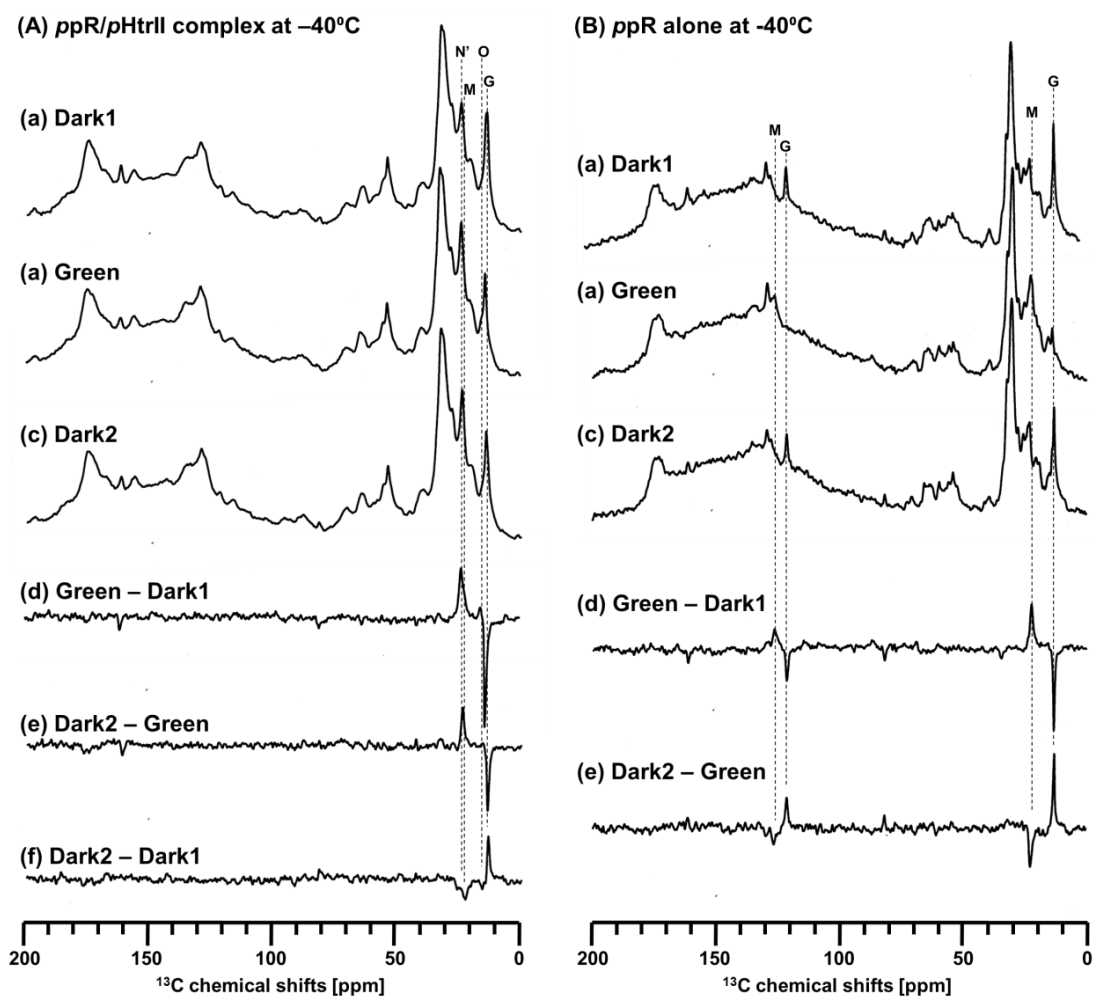

**Figure S1.** A.  $^{13}\text{C}$  CP-MAS NMR spectra and these difference spectra of the  $[20\text{-}^{13}\text{C}]$  retinal labeled *ppR/pHtrII* complex at  $-40\text{ }^{\circ}\text{C}$  using 4 kHz MAS. The range of these spectra was from 0 ppm to 200 ppm. 1D  $^{13}\text{C}$  CP MAS NMR spectra (a) acquired under initial dark conditions (Dark1), (b) acquired under irradiation with green light state (520 nm) (Green) and (c) obtained one day after turning off irradiation (dark2). And these difference spectra (d) obtained by subtracting Dark1 from Green (Green – Dark1), (e) obtained by subtracting Green from Dark2 (Dark2 – Green), and (f) obtained by subtracting Dark1 from Dark2 (Dark2 – Dark1). B.  $^{13}\text{C}$  CP-MAS NMR spectra and these difference spectra of the  $[14,20\text{-}^{13}\text{C}]$  retinal labeled *ppR* alone without *pHtrII* at  $-40\text{ }^{\circ}\text{C}$  using 4 kHz MAS. The range of these spectra was from 0 ppm to 200 ppm. 1D  $^{13}\text{C}$  CP MAS NMR spectra (a) acquired under initial dark conditions (Dark1), (b) acquired under irradiation with green light state (Green) and (c) obtained one day after turning off irradiation (Dark2). And these difference spectra (d) obtained by subtracting Dark1 from Green (Green – Dark1), (e) obtained by subtracting Green from Dark2 (Dark2 – Green).

## Supporting References

1. Tomonaga, Y., T. Hidaka, I. Kawamura, T. Nishio, K. Ohsawa, T. Okitsu, A. Wada, Y. Sudo, N. Kamo, A. Ramamoorthy, and A. Naito. 2011. An active photoreceptor intermediate revealed by in situ photoirradiated solid-state NMR spectroscopy. *Biophys. J.* 101: L50–L52.
2. Yomoda, H., Y. Makino, Y. Tomonaga, T. Hidaka, I. Kawamura, T. Okitsu, A. Wada, Y. Sudo, and A. Naito. 2014. Color-discriminating retinal configurations of sensory rhodopsin I by photo-irradiation solid-state NMR spectroscopy. *Angew. Chemie Int. Ed.* 53: 6960–6964.
3. Harbison, G.S., S.O. Smith, J.A. Pardo, C. Winkel, J. Lugtenburg, J. Herzfeld, R. Mathies, and R.G. Griffin. 1984. Dark-adapted bacteriorhodopsin contains 13-cis, 15-syn and all-trans, 15-anti retinal Schiff bases. *Proc. Natl. Acad. Sci.* 81: 1706–1709.
4. Bajaj, V.S., M.L. Mak-Jurkauskas, M. Belenky, J. Herzfeld, and R.G. Griffin. 2009. Functional and shunt states of bacteriorhodopsin resolved by 250 GHz dynamic nuclear polarization-enhanced solid-state NMR. *Proc. Natl. Acad. Sci.* 106: 9244–9.
5. Petkova, A.T., M. Hatanaka, C.P. Jaroniec, J.G. Hu, M. Belenky, M. Verhoeven, J. Lugtenburg, R.G. Griffin, and J. Herzfeld. 2002. Tryptophan interactions in bacteriorhodopsin: A heteronuclear solid-state NMR study. *Biochemistry.* 41: 2429–2437.
6. Hu, J.G., B.Q. Sun, M. Bizounok, M.E. Hatcher, J.C. Lansing, J. Raap, P.J.E. Verdegem, J. Lugtenburg, R.G. Griffin, and J. Herzfeld. 1998. Early and late M intermediates in the bacteriorhodopsin photocycle: A solid-state NMR study. *Biochemistry.* 37: 8088–8096.
7. Lakshmi, K. V., M.R. Farrar, J. Herzfeld, R.G. Griffin, J. Raap, J. Lugtenburg, and R.G. Griffin. 1994. Solid State <sup>13</sup>C and <sup>15</sup>N NMR Investigations of the N Intermediate of Bacteriorhodopsin. *Biochemistry.* 33: 8853–8857.
8. Oshima, K., A. Shigeta, Y. Makino, I. Kawamura, T. Okitsu, A. Wada, S. Tuzi, T. Iwasa, and A. Naito. 2015. Characterization of photo-intermediates in the photo-reaction pathways of a bacteriorhodopsin Y185F mutant using in situ photo-irradiation solid-state NMR spectroscopy. *Photochem. Photobiol. Sci.* 14: 1694–1702.
